# Supplementary material for: Novel TaqMan PCR Assay for the Quantification of Paenibacillus larvae Spores in Bee-Related Samples
Source: MDPI journal article supplement (doi:10.3390/insects12111034), 2021-11-17
Supplement: s1 [file s1]

**Table S2.** Scale for grading the severity of AFB clinical symptoms.

| <b>Scale</b> | <b>Clinical symptoms</b>                                                                                                                                                                                                                                                                                                                                                                   |
|--------------|--------------------------------------------------------------------------------------------------------------------------------------------------------------------------------------------------------------------------------------------------------------------------------------------------------------------------------------------------------------------------------------------|
| <b>0</b>     | No AFB clinical symptoms                                                                                                                                                                                                                                                                                                                                                                   |
| <b>1</b>     | Low level of scattered/patchy bee brood<br>Low number (1–2 cells per comb) of cell cappings are concave, darkened and/or wet-looking)<br>Some ropy larvae/cell mass of milky to light brown coloration<br>Clinical symptoms are limited to a single comb per colony<br>Colony strength is not affected                                                                                     |
| <b>2</b>     | Scattered/patchy bee brood is clearly visible<br>Bee larvae on individual combs vary in age<br>Some cell cappings are concave, darkened and/or wet-looking<br>Up to five perforated cell cappings per comb<br>Ropy larvae/cell mass of light to dark brown coloration<br>Up to three affected combs per colony<br>Colony strength is slightly decreased                                    |
| <b>3</b>     | High level of scattered/patchy bee brood<br>Bee larvae on individual combs vary in age<br>A lot of cell cappings are concave, darkened and/or wet-looking<br>More than five perforated cell cappings per comb<br>Ropy larvae/cell mass of light to dark brown coloration<br>Clinical symptoms are present in more than three combs per colony<br>Colony strength is considerably decreased |
| <b>4*</b>    | Only few remaining capped cells on combs<br>Most cell cappings are perforated<br>Ropy larvae/cell mass of dark brown coloration<br>Dried-out larvae form a hard scale, that adheres to the cell wall (tongue appearance)<br>Colony strength is highly decreased or there are only a few remaining bees in the hive<br>Colony is robbed                                                     |

\*One honeybee colony was scaled '4' and was interpreted here as '3' for the purpose of statistical analysis.
