# Supplementary material for: Novel TaqMan PCR Assay for the Quantification of Paenibacillus larvae Spores in Bee-Related Samples
Source: Insects. 2021 Nov 17;12(11):1034. doi: 10.3390/insects12111034 (PMC8621733; doi:10.3390/insects12111034)
Supplement: Supplementary file 1 [file insects-12-01034-s001.zip]

Archive with 6 entries (6 files):
- insects-1458549-supplementary/Figure S1.pdf
- insects-1458549-supplementary/Table S1.xlsx
- insects-1458549-supplementary/Table S2.pdf
- insects-1458549-supplementary/Table S3.xlsx
- insects-1458549-supplementary/Table S4.xlsx
- insects-1458549-supplementary/Table S5.xlsx
