# Supplementary material for: Novel TaqMan PCR Assay for the Quantification of Paenibacillus larvae Spores in Bee-Related Samples
Source: Insects. 2021 Nov 17;12(11):1034. doi: 10.3390/insects12111034 (PMC8621733; doi:10.3390/insects12111034)
Supplement: Supplementary file 1 [file insects-12-01034-s001.zip › insects-1458549-supplementary/Table S1.xlsx]

## Sheet: Honey
Table S1. Association between AFB clinical symptoms and Paenibacillus larvae counts determined by qPCR and plate counting for honey samples.
			Apiary	Apiary	Clinical symptoms	qPCR			Plate counting			Above LOQ by	Germination rate [%]
Sample	Apiary code	Hive/colony code	with active AFB	with complete absence of AFB	at hive/colony level	Cq	Spores/g honey	Above LOQ	Result	Spores/g honey	Above LOQ	both methods	(plate counting/qPCR)
1	1	1	Yes	No	2	23.328	125909	Yes	pos	481.203	Yes	Yes		0.382183
2	2	1	Yes	No	2	26.3829	19474	Yes	pos	58.1818	Yes	Yes		0.298766
3	3	1	Yes	No	1	29.6833	3573.6	Yes	pos	38.4615	Yes	Yes		1.07627
4	3	2	Yes	No	3	26.4603	27111.9	Yes	pos	1640	Yes	Yes		6.049
5	4	1	Yes	No	3	22.4854	113569	Yes	pos	ND	ND	ND
6	4	2	Yes	No	4*	17.0082	4.24009e+06	Yes	pos	ND	ND	ND
7	5	1	Yes	No	3	20.4096	407565	Yes	pos	221.843	Yes	Yes		0.0544313
8	5	2	Yes	No	2	24.5287	28429.6	Yes	pos	30.4762	No	No
9	6	1	Yes	No	1	24.0794	91802.4	Yes	pos	227.273	Yes	Yes		0.247567
10	6	2	Yes	No	3	22.8033	366762	Yes	pos	415.385	Yes	Yes		0.113257
11	7	1	Yes	No	1	29.0596	6426.69	Yes	pos	14.5455	No	No
12	8	1	Yes	No	2	20.6186	592827	Yes	pos	211.429	Yes	Yes		0.0356644
13	9	1	Yes	No	1	29.088	2237.26	Yes	pos	5.16129	No	No
14	10	1	Yes	No	1	23.2722	99353.4	Yes	pos	102.857	Yes	Yes		0.103526
15	10	2	Yes	No	1	28.4703	4379.69	Yes	pos	6.66667	No	No
16	10	3	Yes	No	1	25.536	75763.3	Yes	pos	126	Yes	Yes		0.166308
17	10	4	Yes	No	1	26.2176	19154.1	Yes	pos	22.4	Yes	Yes		0.116946
18	10	5	Yes	No	1	26.221	14477.5	Yes	pos	16.3636	Yes	Yes		0.113028
19	10	6	Yes	No	3	20.6214	1.59307e+06	Yes	pos	646.154	Yes	Yes		0.0405603
20	10	7	Yes	No	2	24.1872	40832.4	Yes	pos	20.4348	Yes	Yes		0.0500455
21	11	1	Yes	No	2	28.2963	4376.81	Yes	pos	59.2593	No	No
22	11	2	Yes	No	2	32.4473	516.3	Yes	pos	114.286	No	No
23	11	3	Yes	No	1	30.6179	798.859	Yes	neg	0	No	No
24	11	4	Yes	No	2	24.584	89875.9	Yes	pos	135	Yes	Yes		0.150207
25	11	5	Yes	No	2	30.6995	1019.18	Yes	pos	6.95652	No	No
26	11	6	Yes	No	2	27.8334	9492.81	Yes	pos	9.41176	No	No
27	11	7	Yes	No	2	27.6487	16612.9	Yes	pos	30.9091	Yes	Yes		0.186055
28	12	1	Yes	No	2	22.6414	106338	Yes	pos	610.909	Yes	Yes		0.574499
29	12	2	Yes	No	3	20.1998	550119	Yes	pos	1476.36	Yes	Yes		0.268372
30	12	3	Yes	No	2	20.4842	454272	Yes	pos	694.545	Yes	Yes		0.152892
31	12	4	Yes	No	1	20.1815	556938	Yes	pos	1549.09	Yes	Yes		0.278144
32	12	5	Yes	No	3	19.8567	693039	Yes	pos	1781.82	Yes	Yes		0.257102
33	13	1	Yes	No	1	24.5366	29692.7	Yes	pos	81.4545	Yes	Yes		0.274325
34	13	2	Yes	No	3	18.6806	1.52959e+06	Yes	pos	1298.18	Yes	Yes		0.0848712
35	14	1	Yes	No	3	19.7772	731137	Yes	pos	11680	Yes	Yes		1.59751
36	14	2	Yes	No	1	23.3805	64657.8	Yes	pos	309.091	Yes	Yes		0.478041
37	15	1	Yes	No	2	21.4519	236822	Yes	pos	585.455	Yes	Yes		0.247213
38	15	2	Yes	No	2	20.8645	703349	Yes	pos	945.455	Yes	Yes		0.134422
39	16	1	Yes	No	2	22.0647	156775	Yes	pos	545.455	Yes	Yes		0.347921
40	16	2	Yes	No	2	21.6171	211898	Yes	pos	1029.09	Yes	Yes		0.485653
41	16	3	Yes	No	1	21.6005	214279	Yes	pos	756.364	Yes	Yes		0.35298
42	17	1	Yes	No	0	33.9149	54	No	neg	0	No	No
43	17	2	Yes	No	0	34.567	35	No	pos	3.2	No	No
44	17	3	Yes	No	0	34.306	41	No	neg	0	No	No
45	17	4	Yes	No	0	29.8555	827	Yes	pos	3.2	No	No
46	17	5	Yes	No	0	32.6567	126	Yes	neg	0	No	No
47	17	6	Yes	No	0	31.4133	290	Yes	neg	0	No	No
48	17	7	Yes	No	0	34.8374	29	No	pos	3.2	No	No
49	17	8	Yes	No	0	32.2303	167	Yes	neg	0	No	No
50	17	9	Yes	No	0	31.5726	260	Yes	pos	3.2	No	No
51	17	10	Yes	No	0	36.8984	7	No	neg	0	No	No
52	17	11	Yes	No	0	33.1773	88	Yes	pos	3.2	No	No
53	17	12	Yes	No	0	29.4921	1057	Yes	pos	3.2	No	No
54	17	13	Yes	No	0	32.3722	152	Yes	neg	0	No	No
55	17	14	Yes	No	0	31.635	250	Yes	neg	0	No	No
56	17	15	Yes	No	0	neg	0	No	neg	0	No	No
57	17	16	Yes	No	0	34.4106	39	No	neg	0	No	No
58	17	17	Yes	No	0	31.5519	264	Yes	neg	0	No	No
59	17	18	Yes	No	0	32.9656	102	Yes	neg	0	No	No
60	17	19	Yes	No	0	30.2854	620	Yes	pos	8	Yes	Yes		1.29032
61	17	20	Yes	No	0	36.1125	12	No	neg	0	No	No
62	17	21	Yes	No	0	33.298	82	Yes	neg	0	No	No
63	17	22	Yes	No	0	30.0431	729	Yes	pos	3.2	No	No
64	18	1	Yes	No	0	33.0779	95	Yes	pos	3.2	No	No
65	18	2	Yes	No	0	36.815	8	No	neg	0	No	No				Germination	avg	0.51639
66	18	3	Yes	No	0	28.7233	1773	Yes	pos	3.2	No	No				rate	min	0.0356644
67	18	4	Yes	No	0	33.4117	76	Yes	neg	0	No	No				(n = 31)	max	6.049
Legend:
LOQ				Limit of quantification
				Below LOQ of qPCR assay (58 spores/g honey); for statistical analysis, these values were set at 0.5 LOQ value (i.e., 29 spores/g honey)
				Below LOQ of plate counting (15 colonies/plate); for statistical analysis, these values were set at 0.5 LOQ value (i.e., 8 colonies/plate, then converted to spores/g honey considering the dilution and weight of honey sample)
pos				positive
neg				negative
Apiary with active AFB				AFB is present in the apiary with both clinically positive and negative honeybee colonies/hives (see column "Clinical symptoms at hive/colony level"; negative hives originate from aparies with active AFB).
Apiary with complete absence of AFB				Apiary is completely free from AFB, i.e. has no clinically positive hives, is not located within any of the active AFB zones and has no history of AFB.
Note:
Clinical symptoms were scaled from 0 to 4 as described in Table S2.
*This honeybee colony was scaled '4' and was interpreted here as '3' for the purpose of statistical analysis.
A total of 67 honey samples from 18 apiaries were analyzed.
For the calculation of qPCR and plate counts (spores/g honey), any deviation from the set weight (i.e., 50 g) of input honey sample was also considered.

## Sheet: Hive debris
Table S1. Association between AFB clinical symptoms and Paenibacillus larvae counts determined by qPCR for hive debris samples.
			Apiary	Apiary	Clinical symptoms	qPCR
Sample	Apiary code	Hive/colony code	with active AFB	with complete absence of AFB	at hive/colony level	Cq	Spores/ml debris	Above LOQ
1	17	1	Yes	No	0	27.5438	123782	Yes
2	17	2	Yes	No	0	34.3592	1023.56	Yes
3	17	3	Yes	No	0	32.7597	3153.94	Yes
4	17	4	Yes	No	0	30.6169	14244.3	Yes
5	17	5	Yes	No	0	21.9992	6.1222e+06	Yes
6	17	6	Yes	No	0	33.2984	2159.03	Yes
7	17	7	Yes	No	0	27.5998	118998	Yes
8	17	8	Yes	No	0	28.3548	69958.3	Yes
9	17	9	Yes	No	0	32.6572	3389.93	Yes
10	17	10	Yes	No	0	32.8644	2929.95	Yes
11	17	11	Yes	No	0	30.7769	12727.6	Yes
12	17	13	Yes	No	0	34.1046	1224.39	Yes
13	17	14	Yes	No	0	19.3006	4.08783e+07	Yes
14	17	15	Yes	No	0	33.981	1335.62	Yes
15	17	16	Yes	No	0	34.1856	1156.57	Yes
16	17	17	Yes	No	0	30.1498	19786.4	Yes
17	17	18	Yes	No	0	30.2046	19038.2	Yes
18	17	19	Yes	No	0	28.5004	63149.5	Yes
19	17	20	Yes	No	0	32.0343	5254.33	Yes
20	17	21	Yes	No	0	27.5238	125535	Yes
21	17	22	Yes	No	0	30.2339	18649.8	Yes
22	18	1	Yes	No	0	30.918	11524.3	Yes
23	18	2	Yes	No	0	33.5618	1793.84	Yes
24	18	3	Yes	No	0	32.2049	4659.97	Yes
25	18	4	Yes	No	0	31.9834	5445.98	Yes
26	19	1	No	No	0	29.96	22612.9	Yes
27	19	2	No	No	0	27.67	113266	Yes
28	19	3	No	No	0	29.57	29752.7	Yes
29	19	4	No	No	0	25.71	449789	Yes
30	19	5	No	No	0	31.76	6372.93	Yes
31	19	6	No	No	0	30.25	18439.2	Yes
32	19	7	No	No	0	26.92	191988	Yes
33	19	8	No	No	0	26.97	185352	Yes
34	19	9	No	No	0	31.24	9188.25	Yes
35	20	pooled sample from 22 colonies	No	Yes	0	neg	0	No
36	21	1	No	No	0	16.59	2.75273e+08	Yes
37	21	2	No	No	0	21.54	8.45699e+06	Yes
38	22	1	Yes	No	2	13.73	2.05911e+09	Yes
39	22	2	Yes	No	2	16.04	4.05345e+08	Yes
40	22	3	Yes	No	1	18.08	9.64876e+07	Yes
41	22	4	Yes	No	2	15.67	5.25876e+08	Yes
42	22	5	Yes	No	0	14.3	1.37882e+09	Yes
43	22	6	Yes	No	1	17.92	1.07985e+08	Yes
44	23	1	Yes	No	2	15.37	6.49461e+08	Yes
45	23	2	Yes	No	2	12.62	4.49633e+09	Yes
46	23	3	Yes	No	1	14.79	9.76745e+08	Yes
47	24	1	Yes	No	0	24.1	1.39627e+06	Yes
48	24	2	Yes	No	0	21.65	7.82715e+06	Yes
49	24	3	Yes	No	0	24.12	1.37676e+06	Yes
50	24	4	Yes	No	0	27.09	170345	Yes
51	24	5	Yes	No	1	27.34	142869	Yes
52	24	6	Yes	No	2	23.17	2.68624e+06	Yes
53	24	7	Yes	No	0	24.8	853244	Yes
54	24	8	Yes	No	0	18.21	8.80538e+07	Yes
55	24	9	Yes	No	0	20.46	1.80812e+07	Yes
56	24	10	Yes	No	0	25.88	399082	Yes
57	24	11	Yes	No	2	17.38	1.57895e+08	Yes
58	24	12	Yes	No	0	26.31	294896	Yes
59	24	13	Yes	No	0	12.18	6.12783e+09	Yes
60	24	14	Yes	No	0	25.77	431196	Yes
61	24	15	Yes	No	0	16.71	2.52986e+08	Yes
62	24	16	Yes	No	0	24.26	1.24761e+06	Yes
63	24	17	Yes	No	0	12.7	4.25023e+09	Yes
64	24	18	Yes	No	0	13.89	1.83988e+09	Yes
65	24	19	Yes	No	0	26.93	190642	Yes
66	24	20	Yes	No	0	25.43	547730	Yes
67	24	21	Yes	No	1	16.56	2.81145e+08	Yes
68	24	22	Yes	No	0	26.11	339455	Yes
69	24	23	Yes	No	0	20.23	2.12572e+07	Yes
70	24	24	Yes	No	0	18.76	5.97981e+07	Yes
71	24	25	Yes	No	0	18.61	6.64541e+07	Yes
72	24	26	Yes	No	0	24.58	996087	Yes
73	24	27	Yes	No	0	21.49	8.7598e+06	Yes
74	24	28	Yes	No	0	26.39	278756	Yes
75	24	29	Yes	No	0	25.72	446635	Yes
76	24	30	Yes	No	0	16.52	2.8917e+08	Yes
77	25	1	Yes	No	2	12.57	4.65732e+09	Yes
78	25	2	Yes	No	1	14.69	1.04794e+09	Yes
79	25	3	Yes	No	1	13.57	2.30447e+09	Yes
80	25	4	No	No	0	18.67	6.37071e+07	Yes
81	25	5	Yes	No	1	12.27	5.75182e+09	Yes
82	25	6	Yes	No	1	14.11	1.57603e+09	Yes
83	26	1	No	No	0	18.95	5.23154e+07	Yes
84	26	2	No	No	0	24.71	909021	Yes
85	26	3	No	No	0	21.68	7.66367e+06	Yes
86	26	4	No	No	0	21.55	8.39769e+06	Yes
87	26	5	No	No	0	23.63	1.9435e+06	Yes
88	26	6	No	No	0	18.5	7.18016e+07	Yes
89	26	7	No	No	0	21.24	1.04444e+07	Yes
90	26	8	No	No	0	22.26	5.09576e+06	Yes
91	27	1	No	Yes	0	neg	0	No
92	27	2	No	Yes	0	35.25	546.91	No
93	27	3	No	Yes	0	neg	0	No
94	27	4	No	Yes	0	neg	0	No
95	27	5	No	Yes	0	36.07	307.152	No
96	27	6	No	Yes	0	36.98	161.915	No
97	27	7	No	Yes	0	37.06	153.053	No
98	27	8	No	Yes	0	neg	0	No
99	27	9	No	Yes	0	neg	0	No
100	27	10	No	Yes	0	36.83	179.938	No
101	27	11	No	Yes	0	neg	0	No
102	28	1	No	No	0	28.24	75845.3	Yes
103	29	pooled sample from 70 colonies	No	No	0	34,41/33,94	987.623	Yes
104	30	pooled sample	No	Yes	0	neg	0	No
105	31	1	No	No	0	25.16	662323	Yes
106	32	1	No	No	0	26.78	211862	Yes
107	32	2	No	No	0	neg	0	No
Legend:
LOQ				Limit of quantification
				Below LOQ of qPCR assay (707 spores/ml hive debris); for statistical analysis, these values were set at 0.5 LOQ value (i.e., 354 spores/ml hive debris)
neg				negative
Apiary with active AFB				AFB is present in the apiary with both clinically positive and negative honeybee colonies/hives (see column "Clinical symptoms at hive/colony level"; negative hives originate from aparies with active AFB).
Apiary with full absence of AFB				Apiary is completely free from AFB, i.e. has no clinically positive hives, is not located within any of the active AFB zones and has no history of AFB.
Note:
Clinical symptoms were scaled from 0 to 2 as described in Table S2.
A total of 107 hive debris samples from 16 apiaries were analyzed.
Plate counting was not performed for hive debris samples.
Hive 12 from apiary 17: honey sample collected, hive debris sample not collected.
