# Supplementary material for: Novel TaqMan PCR Assay for the Quantification of Paenibacillus larvae Spores in Bee-Related Samples
Source: Insects. 2021 Nov 17;12(11):1034. doi: 10.3390/insects12111034 (PMC8621733; doi:10.3390/insects12111034)
Supplement: Supplementary file 1 [file insects-12-01034-s001.zip › insects-1458549-supplementary/Table S3.xlsx]

## Sheet: In silico qPCR inclusivity
Table S3. In silico qPCR inclusivity.
Strain	Species	ERIC type	Primer/probe mismatch	Metalloproteinase BLASTn hit (cut-off: 70% cov, 90% ident)	SRA accession number	NCBI genome accession number	Reference	Note (ERIC type)
PL126	Paenibacillus larvae	I	None	Yes	SRR14027357		Žugelj et al. 2021 Insects. doi: 10.3390/insects12040362
PL154	Paenibacillus larvae	I	None	Yes	SRR14027335		Žugelj et al. 2021 Insects. doi: 10.3390/insects12040362
PL136	Paenibacillus larvae	I	None	Yes	SRR14027356		Žugelj et al. 2021 Insects. doi: 10.3390/insects12040362
PL137	Paenibacillus larvae	I	None	Yes	SRR14027345		Žugelj et al. 2021 Insects. doi: 10.3390/insects12040362
PL138	Paenibacillus larvae	I	None	Yes	SRR14027340		Žugelj et al. 2021 Insects. doi: 10.3390/insects12040362
PL139	Paenibacillus larvae	I	None	Yes	SRR14027339		Žugelj et al. 2021 Insects. doi: 10.3390/insects12040362
PL27	Paenibacillus larvae	I	None	Yes	SRR11348839		Papić et al. 2021 Front Vet Sci. doi: 10.3389/fvets.2021.582677
PL144	Paenibacillus larvae	I	None	Yes	SRR14027338		Žugelj et al. 2021 Insects. doi: 10.3390/insects12040362
PL145	Paenibacillus larvae	I	None	Yes	SRR14027337		Žugelj et al. 2021 Insects. doi: 10.3390/insects12040362
PL30	Paenibacillus larvae	I	None	Yes	SRR11348836		Papić et al. 2021 Front Vet Sci. doi: 10.3389/fvets.2021.582677
PL171	Paenibacillus larvae	I*	None	Yes	SRR12328836		Žugelj et al. 2021 Insects. doi: 10.3390/insects12040362	* ERIC I isolates exhibiting a slightly altered pattern with an additional 600-bp band (described in Žugelj et al. 2021 Insects)
PL172	Paenibacillus larvae	I*	None	Yes	SRR12328834		Žugelj et al. 2021 Insects. doi: 10.3390/insects12040362	*
PL196	Paenibacillus larvae	I*	None	Yes	SRR12328825		Žugelj et al. 2021 Insects. doi: 10.3390/insects12040362	*
PL148	Paenibacillus larvae	I*	None	Yes	SRR12328817		Žugelj et al. 2021 Insects. doi: 10.3390/insects12040362	*
PL173	Paenibacillus larvae	I*	None	Yes	SRR12328833		Žugelj et al. 2021 Insects. doi: 10.3390/insects12040362	*
PL149	Paenibacillus larvae	I*	None	Yes	SRR12328819		Žugelj et al. 2021 Insects. doi: 10.3390/insects12040362	*
PL198	Paenibacillus larvae	I*	None	Yes	SRR12328838		Žugelj et al. 2021 Insects. doi: 10.3390/insects12040362	*
PL199	Paenibacillus larvae	I*	None	Yes	SRR12328840		Žugelj et al. 2021 Insects. doi: 10.3390/insects12040362	*
PL200	Paenibacillus larvae	I*	None	Yes	SRR12328839		Žugelj et al. 2021 Insects. doi: 10.3390/insects12040362	*
PL201	Paenibacillus larvae	I*	None	Yes	SRR12328837		Žugelj et al. 2021 Insects. doi: 10.3390/insects12040362	*
PL190	Paenibacillus larvae	I**	None	Yes	SRR12328845		Žugelj et al. 2021 Insects. doi: 10.3390/insects12040362	** ERIC I isolates exhibiting a slightly altered pattern with an additional 650-bp band (described in Žugelj et al. 2021 Insects)
PL191	Paenibacillus larvae	I**	None	Yes	SRR12328835		Žugelj et al. 2021 Insects. doi: 10.3390/insects12040362	**
PL192	Paenibacillus larvae	I**	None	Yes	SRR12328824		Žugelj et al. 2021 Insects. doi: 10.3390/insects12040362	**
PL194	Paenibacillus larvae	I**	None	Yes	SRR12328850		Žugelj et al. 2021 Insects. doi: 10.3390/insects12040362	**
PL195	Paenibacillus larvae	I**	None	Yes	SRR12328815		Žugelj et al. 2021 Insects. doi: 10.3390/insects12040362	**
PL181	Paenibacillus larvae	I**	None	Yes	SRR12328844		Žugelj et al. 2021 Insects. doi: 10.3390/insects12040362	**
PL182	Paenibacillus larvae	I**	None	Yes	SRR12328814		Žugelj et al. 2021 Insects. doi: 10.3390/insects12040362	**
PL183	Paenibacillus larvae	I**	None	Yes	SRR12328849		Žugelj et al. 2021 Insects. doi: 10.3390/insects12040362	**
PL184	Paenibacillus larvae	I**	None	Yes	SRR12328848		Žugelj et al. 2021 Insects. doi: 10.3390/insects12040362	**
PL185	Paenibacillus larvae	I**	None	Yes	SRR12328846		Žugelj et al. 2021 Insects. doi: 10.3390/insects12040362	**
PL1	Paenibacillus larvae	II	None	Yes	SRR11348858		Papić et al. 2021 Front Vet Sci. doi: 10.3389/fvets.2021.582677
PL2	Paenibacillus larvae	II	None	Yes	SRR11348857		Papić et al. 2021 Front Vet Sci. doi: 10.3389/fvets.2021.582677
PL197	Paenibacillus larvae	II	None	Yes	SRR14352922		Žugelj et al. 2021 Insects. doi: 10.3390/insects12040362
PL3	Paenibacillus larvae	II	None	Yes	SRR11348846		Papić et al. 2021 Front Vet Sci. doi: 10.3389/fvets.2021.582677
PL4	Paenibacillus larvae	II	None	Yes	SRR11348835		Papić et al. 2021 Front Vet Sci. doi: 10.3389/fvets.2021.582677
PL127	Paenibacillus larvae	II	None	Yes	SRR15304995
PL128	Paenibacillus larvae	II	None	Yes	SRR15304994
PL129	Paenibacillus larvae	II	None	Yes	SRR15304993
PL130	Paenibacillus larvae	II	None	Yes	SRR15304992
PL131	Paenibacillus larvae	II	None	Yes	SRR15304996
DSM 7030	Paenibacillus larvae	I	None	Yes		NZ_CP019651.1	Beims et al. 2020 Int J Med Microbiol. doi: 10.1016/j.ijmm.2020.151394
ATCC 9545	Paenibacillus larvae	I	None	Yes		NZ_CP019687.1		Reference strain (see Table S4)
DSM 25430	Paenibacillus larvae	II	None	Yes		NC_023134.1
LMG 16252	Paenibacillus larvae	III	None	Yes		NZ_CP019655.1	Beims et al. 2020 Int J Med Microbiol. doi: 10.1016/j.ijmm.2020.151394	Reference strain (see Table S4)
LMG 16247	Paenibacillus larvae	IV	None	Yes		NZ_CP019659.1	Beims et al. 2020 Int J Med Microbiol. doi: 10.1016/j.ijmm.2020.151394
CCM 38	Paenibacillus larvae	IV	None	Yes		NZ_CP020327.1
ATCC 135137	Paenibacillus larvae	IV	None	Yes		NZ_CP019794.1
Eric_V	Paenibacillus larvae	V	None	Yes		CP019717.1		Reference strain (see Table S4)
SAG 10367	Paenibacillus larvae	ND	None	Yes		NZ_CP020557.1		Presumable novel ERIC type (Papić et al 2021 Front Vet Sci. doi: 10.3389/fvets.2021.582677)

## Sheet: In silico qPCR exclusivity
Table S3. In silico qPCR exclusivity.
Strain	Species*	NCBI genome accession number	Metalloprotease BLASTn hit (cut-off: 70% cov, 90% ident)
2CS3	Paenibacillus validus	WNZX00000000.1	No
SWL-W8	Paenibacillus elgii	JAAIVH000000000.1	No
XB	Paenibacillus physcomitrellae	NZ_CP022584.1	No
MSt1	Paenibacillus tyrfis	JNVM00000000.1	No
DSM 16969	Paenibacillus harenae	AULV00000000.1	No
	*EzBioCloud was used to identify the most closely related species according to 16S rRNA gene identity (%)
