# Supplementary material for: Novel TaqMan PCR Assay for the Quantification of Paenibacillus larvae Spores in Bee-Related Samples
Source: Insects. 2021 Nov 17;12(11):1034. doi: 10.3390/insects12111034 (PMC8621733; doi:10.3390/insects12111034)
Supplement: Supplementary file 1 [file insects-12-01034-s001.zip › insects-1458549-supplementary/Table S4.xlsx]

## Sheet: In vitro qPCR inclusivity
Table S4. In vitro qPCR inclusivity.
Species	Strain	ERIC type	qPCR result	Comment	Note
Paenibacillus larvae	ATCC 9545	I	Positive	Reference strain
Paenibacillus larvae	CCUG 49660A	II	Positive	Reference strain
Paenibacillus larvae	LMG 16252	III	Positive	Reference strain
Paenibacillus larvae	LMG 15974	IV	Positive	Reference strain
Paenibacillus larvae	Eric_V	V	Positive	Reference strain
Paenibacillus larvae	8/31	I	Positive	Field strain
Paenibacillus larvae	6/81	I	Positive	Field strain
Paenibacillus larvae	9/24	I	Positive	Field strain
Paenibacillus larvae	9/67	I	Positive	Field strain
Paenibacillus larvae	1/56	I*	Positive	Field strain	* ERIC I isolates exhibiting a slightly altered pattern with an additional 600-bp band (described in Žugelj et al. 2021 Insects)
Paenibacillus larvae	2/48	I*	Positive	Field strain	*
Paenibacillus larvae	3/10	I*	Positive	Field strain	*
Paenibacillus larvae	4/37	I*	Positive	Field strain	*
Paenibacillus larvae	4/38	I*	Positive	Field strain	*
Paenibacillus larvae	16/10	I**	Positive	Field strain	** ERIC I isolates exhibiting a slightly altered pattern with an additional 650-bp band (described in Žugelj et al. 2021 Insects)
Paenibacillus larvae	3/36	I**	Positive	Field strain	**
Paenibacillus larvae	4/73	I**	Positive	Field strain	**
Paenibacillus larvae	3/37	I**	Positive	Field strain	**
Paenibacillus larvae	3/39	I**	Positive	Field strain	**
Paenibacillus larvae	16/6	I**	Positive	Field strain	**
Paenibacillus larvae	9/79	II	Positive	Field strain
Paenibacillus larvae	8/65	II	Positive	Field strain
Paenibacillus larvae	10/1	II	Positive	Field strain
Paenibacillus larvae	10/7	II	Positive	Field strain
Paenibacillus larvae	10/13	II	Positive	Field strain
Paenibacillus larvae	9/27	II	Positive	Field strain
Paenibacillus larvae	9/28	II	Positive	Field strain
Paenibacillus larvae	9/29	II	Positive	Field strain

## Sheet: In vitro qPCR exclusivity
Table S4. In vitro qPCR exclusivity.
Species	Strain	qPCR result
Bacillus pumilus	LMG 18928	Negative
Chritidia mellificae	ATCC 30254	Negative
Lotmaria passim	ATCC PRA-403	Negative
Melissococcus plutonius	LMG 20360	Negative
Nosema apis	Internal control strain obtained during interlaboratory proficiency testing	Negative
Nosema ceranae	Internal control strain obtained during interlaboratory proficiency testing	Negative
Paenibacillus alvei	ATCC 46344	Negative
