# Supplementary material for: Novel TaqMan PCR Assay for the Quantification of Paenibacillus larvae Spores in Bee-Related Samples
Source: Insects. 2021 Nov 17;12(11):1034. doi: 10.3390/insects12111034 (PMC8621733; doi:10.3390/insects12111034)
Supplement: Supplementary file 1 [file insects-12-01034-s001.zip › insects-1458549-supplementary/Table S5.xlsx]

## Sheet: dPCR vs qPCR
Table S5. Comparison of dPCR and qPCR for honey and hive debris samples.
Sample	Sample	dPCR				qPCR
type	name	Copies/µla	Precision (%)b	Spores/g honey OR spores/ml hive debrisc	log dPCR	Cq_1	Cq_2	Cq_3	avg Cq	Spores/g honey OR spores/ml hive debrisd	log qPCR
Honey	H1	517.71	5.65	10354.2	4.01512	25.9109	25.8378	25.8929	25.8805	12016.2	4.07977
Honey	H2	3779.2	2.42	75584	4.87843	22.6093	22.5418	22.5182	22.5564	112597	5.05153
Honey	H3	5691.1	2.09	113822	5.05623	21.8781	21.8676	21.8753	21.8737	178289	5.25112
Honey	H4	587.85	5.41	11757	4.0703	25.6978	25.7063	25.691	25.6984	13583.9	4.13302
Honey	H5	9525.3	1.93	190506	5.27991	20.986	21.0243	21.0655	21.0253	315604	5.49914	max.
Honey	H6	1771.2	3.23	35424	4.5493	23.8794	23.8476	23.9148	23.8806	46176.7	4.66442
Honey	H7	1804.3	3.23	36086	4.55734	24.1509	24.108	24.082	24.1136	39472.9	4.5963
Honey	H8	7939.5	2	158790	5.20082	21.3742	21.3448	21.7097	21.4762	232974	5.36731
Honey	H9	5387.6	2.17	107752	5.03243	22.2959	22.2851	22.2612	22.2807	135557	5.13212
Honey	H10	28.612	25.79	572.24	2.75758	30.4339	30.1237	29.9006	30.1527	677.403	2.83085
Honey	H11	41.333	20.97	826.66	2.91733	29.7282	29.7709	29.6784	29.7258	902.913	2.95565
Honey	H12	24.501	27.76	490.02	2.69021	30.6676	30.5255	30.329	30.5074	533.549	2.72717	min.
Honey	H13	35.073	22.54	701.46	2.846	30.2426	30.3528	30.2608	30.2854	619.532	2.79206
Honey	H14	56.839	17.61	1136.78	3.05568	29.3403	29.0086	29.1567	29.1685	1313.91	3.11857
Hive debris	D1	33.266	24.17	33266	4.522	29.9773	29.9854	30.0311	29.9979	22017.4	4.34277
Hive debris	D2	1469.4	3.44	1469400	6.16714	24.4039	24.3748	24.3867	24.3885	1.13979e+06	6.05682
Hive debris	D3	9756.1	1.98	9756100	6.98928	21.5572	21.5574	21.5782	21.5643	8.31382e+06	6.9198	max.
Hive debris	D4	166.41	9.9	166410	5.22118	27.7251	27.8013	27.7417	27.756	106613	5.02781
Hive debris	D5	6672.1	2.03	6672100	6.82426	22.1367	21.9818	22.0899	22.0695	5.83108e+06	6.76575
Hive debris	D6	155.31	10.45	155310	5.1912	28.1323	27.9737	27.7896	27.9652	92023.3	4.9639
Hive debris	D7	90.686	13.77	90686	4.95754	28.4702	28.3335	28.3205	28.3747	68985.6	4.83876
Hive debris	D8	31.379	24.33	31379	4.49664	30.0848	30.3323	30.3472	30.2548	18377.5	4.26429
Hive debris	D9	28.636	25.59	28636	4.45691	30.3384	30.0505	30.4052	30.2647	18249.5	4.26125
Hive debris	D10	86.549	14.52	86549	4.93726	28.5965	28.4079	28.6128	28.5391	61453.2	4.78854
Hive debris	D11	148.21	10.77	148210	5.17088	27.7559	27.6411	27.6889	27.6953	111268	5.04637
Hive debris	D12	27.512	26.83	27512	4.43952	30.1848	30.2271	30.2629	30.2249	18767.3	4.2734	min.
Note:
To ensure that the comparison of qPCR and dPCR is within the quantifiable range, only samples with 20-10,000 copies/µl and precision <30% using dPCR were included into the analysis.
a Copies of target (P. larvae spores) per µl of extracted DNA (from 50 g of honey or 5 ml of hive debris sample)
b Precision (%) as given by QuantStudio 3D AnalysisSuite software (lower numeric values mean better precision)
c Calculated from column C (copies/µl):
1. Multiplied by 100 (100 µl was the final volume of the extracted DNA),
2a (honey). Divided by 5 (50 g was the initial amount of honey samples and 1/10 was used for DNA extraction, i.e. 5× of honey sample unit [g]) OR
2b (hive debris). Multiplied by 10 (5 ml was the initial amount of hive debris samples, supplemented with saline solution to the final volume of 50 ml and 1/50 was used for DNA extraction, i.e. 1/10 of hive debris sample unit [ml])
d qPCR was performed in 3 technical replicates; the average (avg) Cq was transformed into absolute values (spores/sample unit) according to the linear regression equation obtained after calilbration of qPCR using dPCR
